# Supplementary material
Source: MDPI journal article supplement (https://www.mdpi.com/1424-8247/16/11/1621)
Supplement: s1 [file s1]

Supplementary Material

**QSAR Studies, Synthesis, and Biological Evaluation of New  
Pyrimido-Isoquinolin-Quinone Derivatives against Methicillin-Resistant  
*Staphylococcus aureus***

Juan Andrades-Lagos <sup>1,2</sup>, Javier Campanini-Salinas <sup>2,3,\*</sup>, Gianfranco Sabadini <sup>4,5</sup>,  
Victor Andrade <sup>6,7,8</sup>, Jaime Mella <sup>4,5,\*</sup> and David Vásquez-Velásquez <sup>2,\*</sup>

**Figure S1.** The Chemical structure of the compounds used to construct the QSAR models.

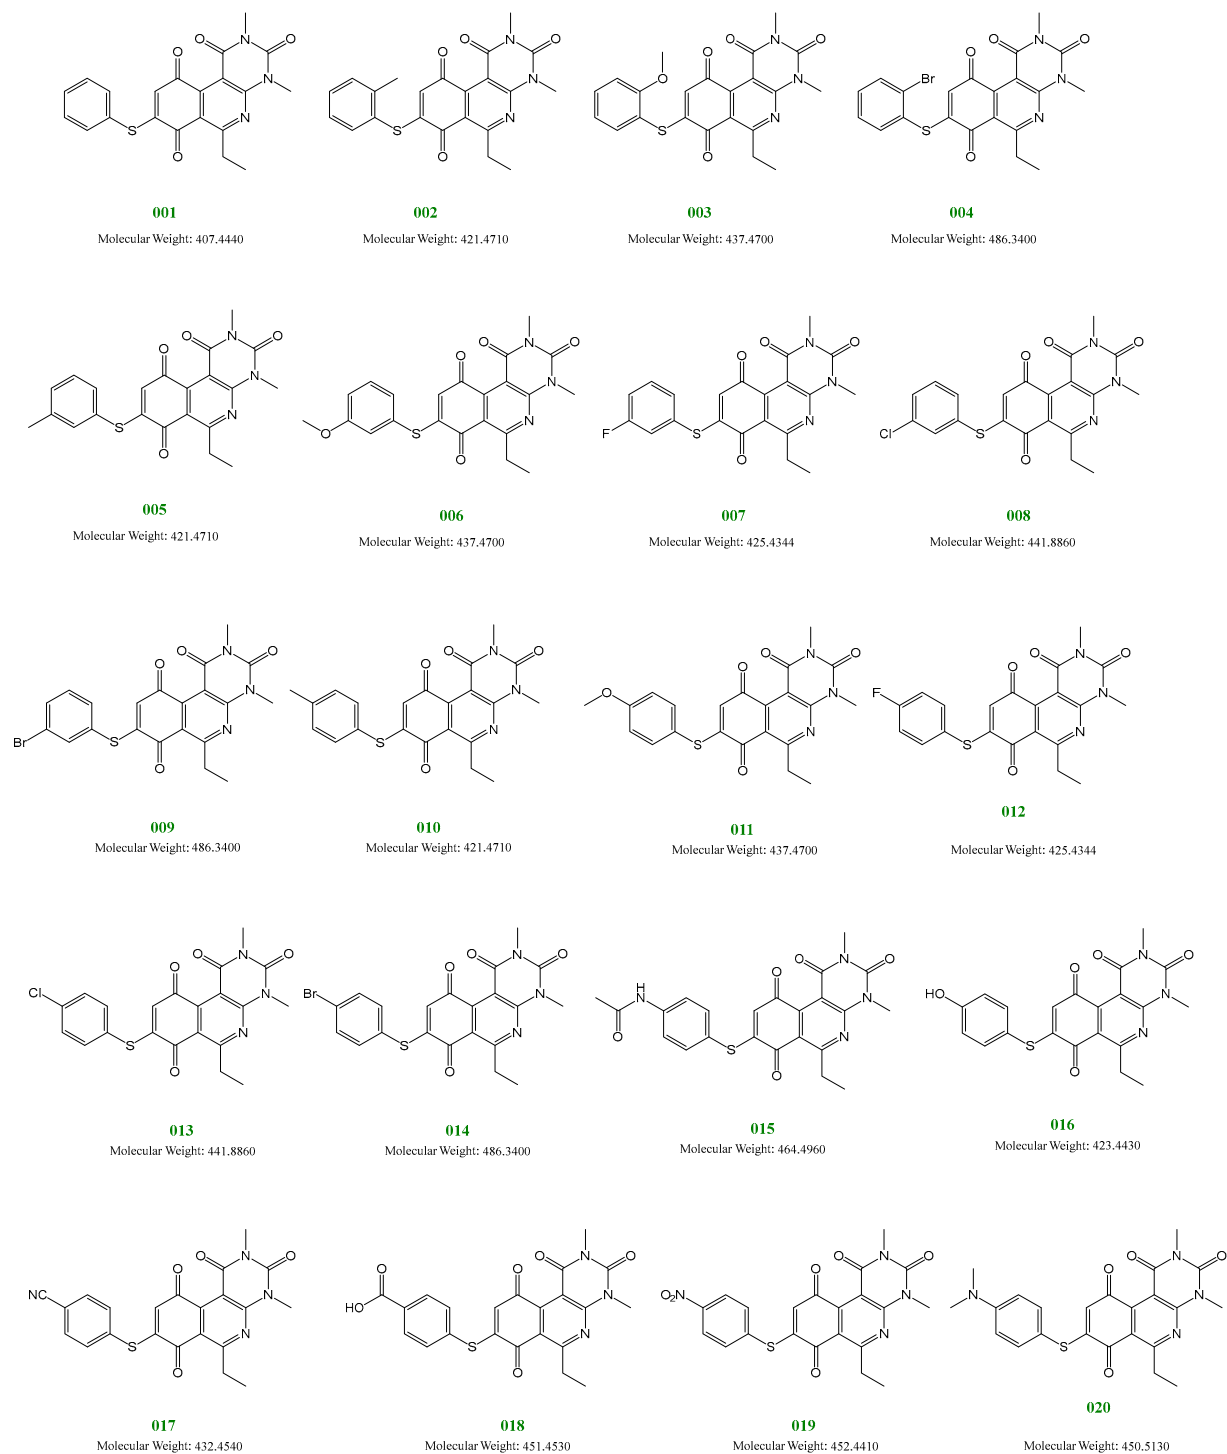

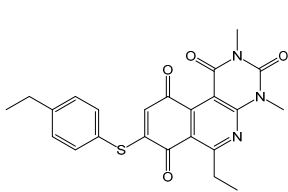

**021**

Molecular Weight: 435.4980

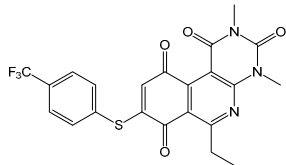

**022**

Molecular Weight: 475.4422

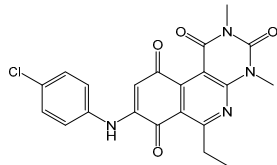

**023**

Molecular Weight: 424.8410

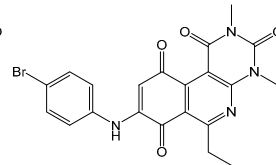

**024**

Molecular Weight: 469.2950

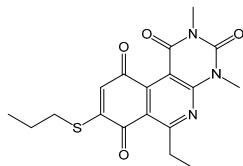

**025**

Molecular Weight: 373.4270

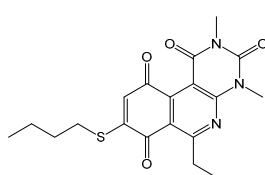

**026**

Molecular Weight: 387.4540

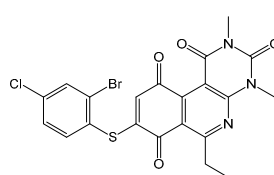

**027**

Molecular Weight: 520.7820

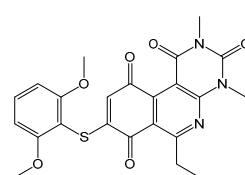

**028**

Molecular Weight: 467.4960

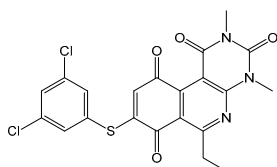

**029**

Molecular Weight: 476.3280

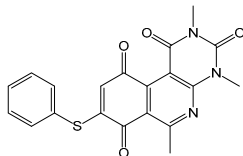

**030**

Molecular Weight: 393.4170

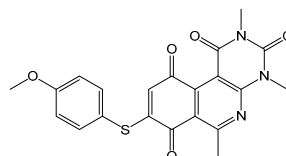

**031**

Molecular Weight: 423.4430

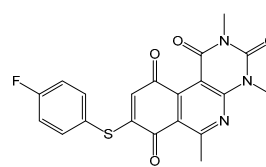

**032**

Molecular Weight: 411.4074

**Figure S2.** The chemical structure of the new designed and synthesized compounds.

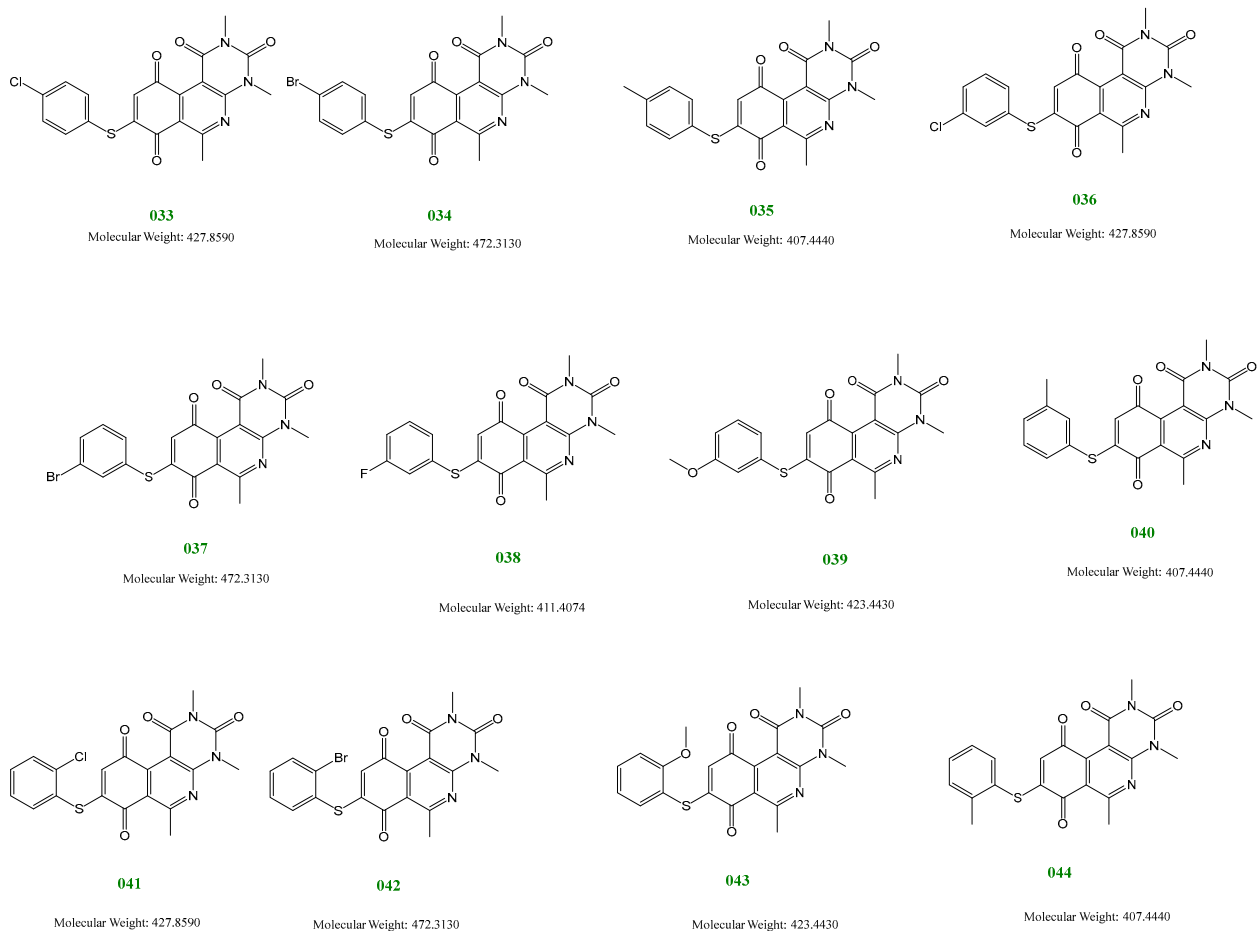

**Figure S3.** <sup>1</sup>H-NMR compound 33.

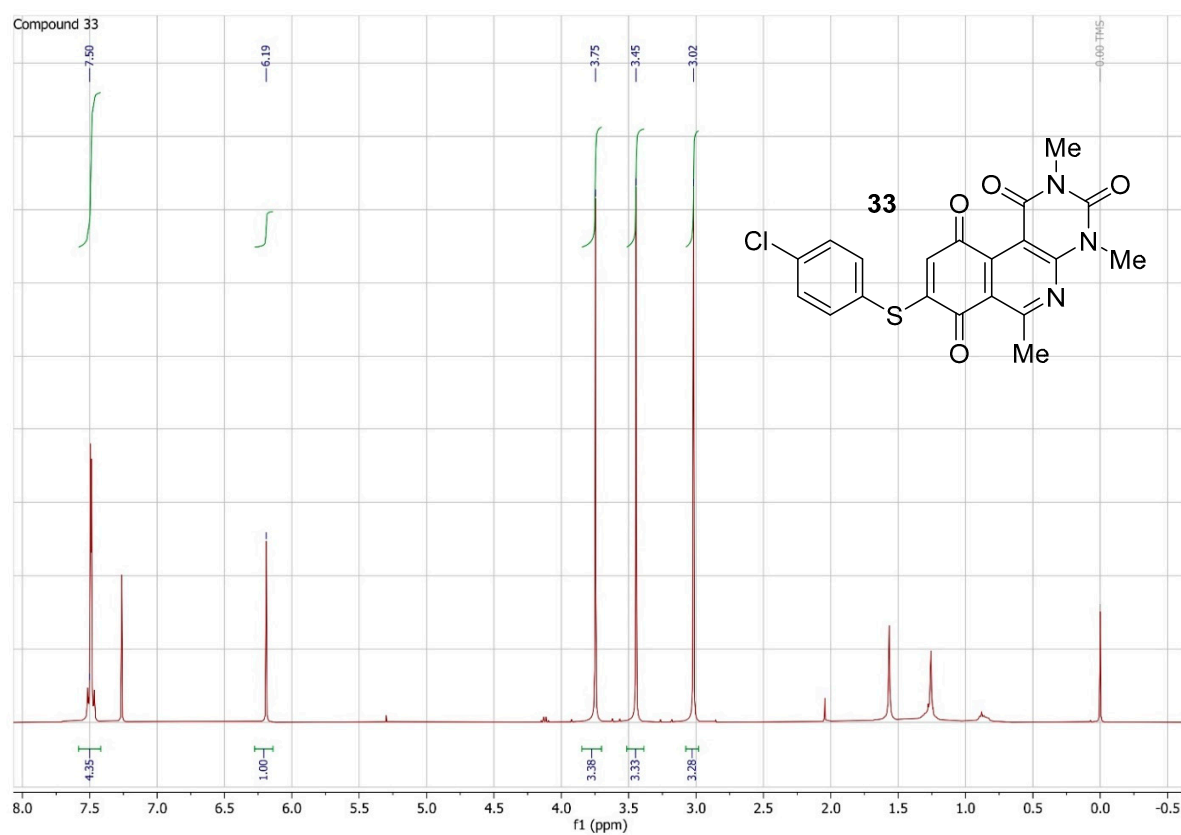

**Figure S4.** <sup>1</sup>H-NMR compound 34.

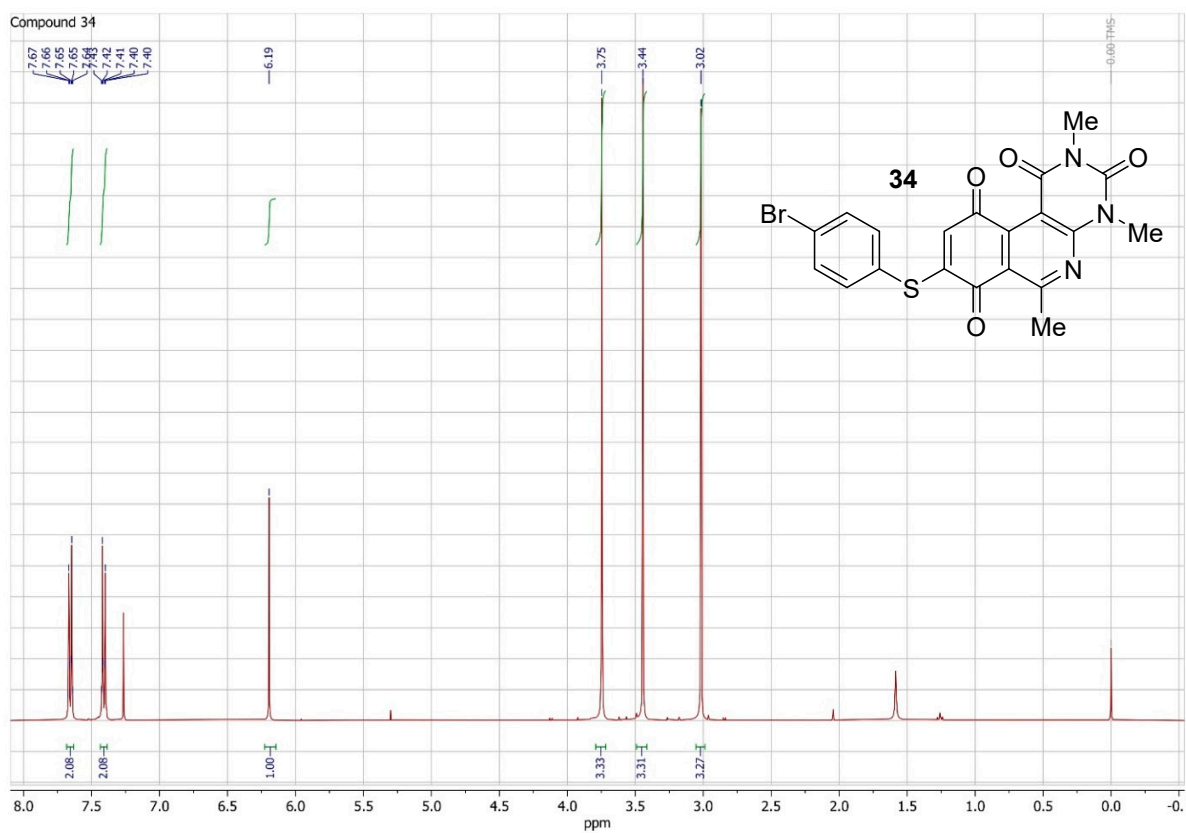

**Figure S5.** <sup>1</sup>H-NMR compound 35.

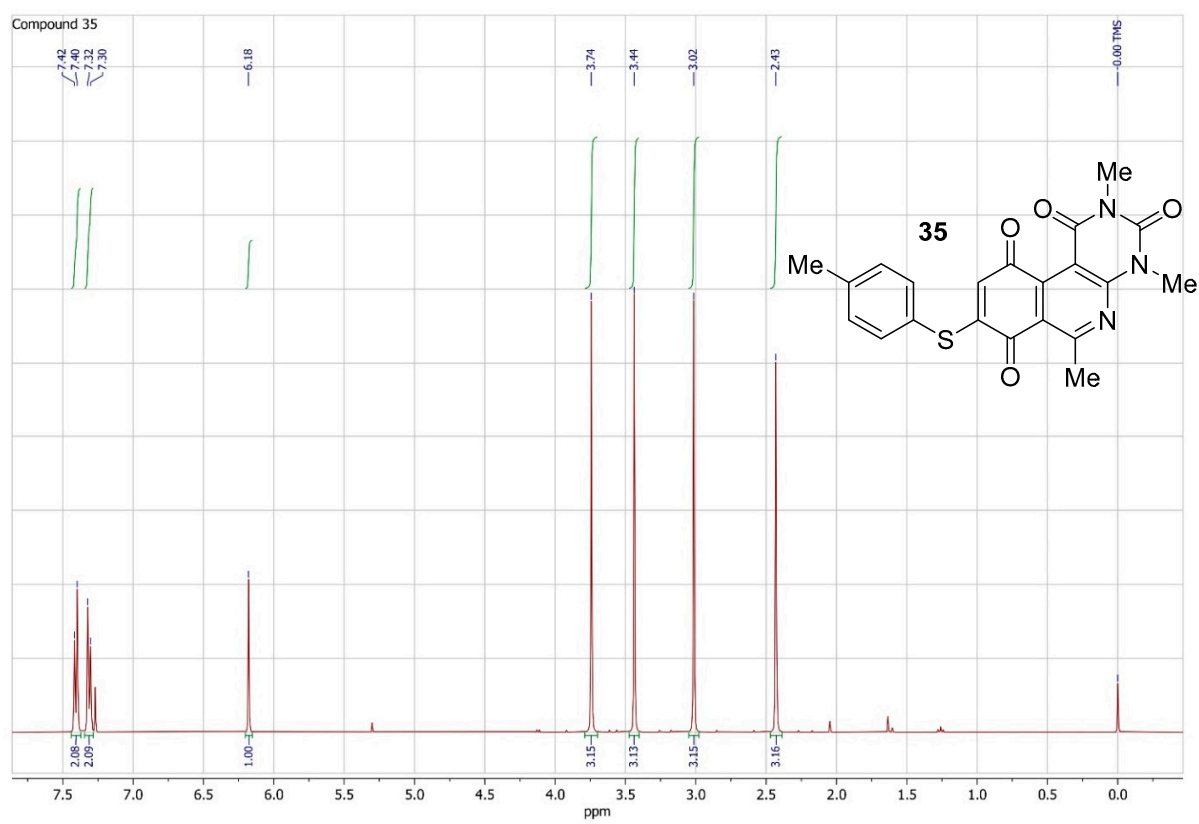

**Figure S6.** <sup>1</sup>H-NMR compound 36.

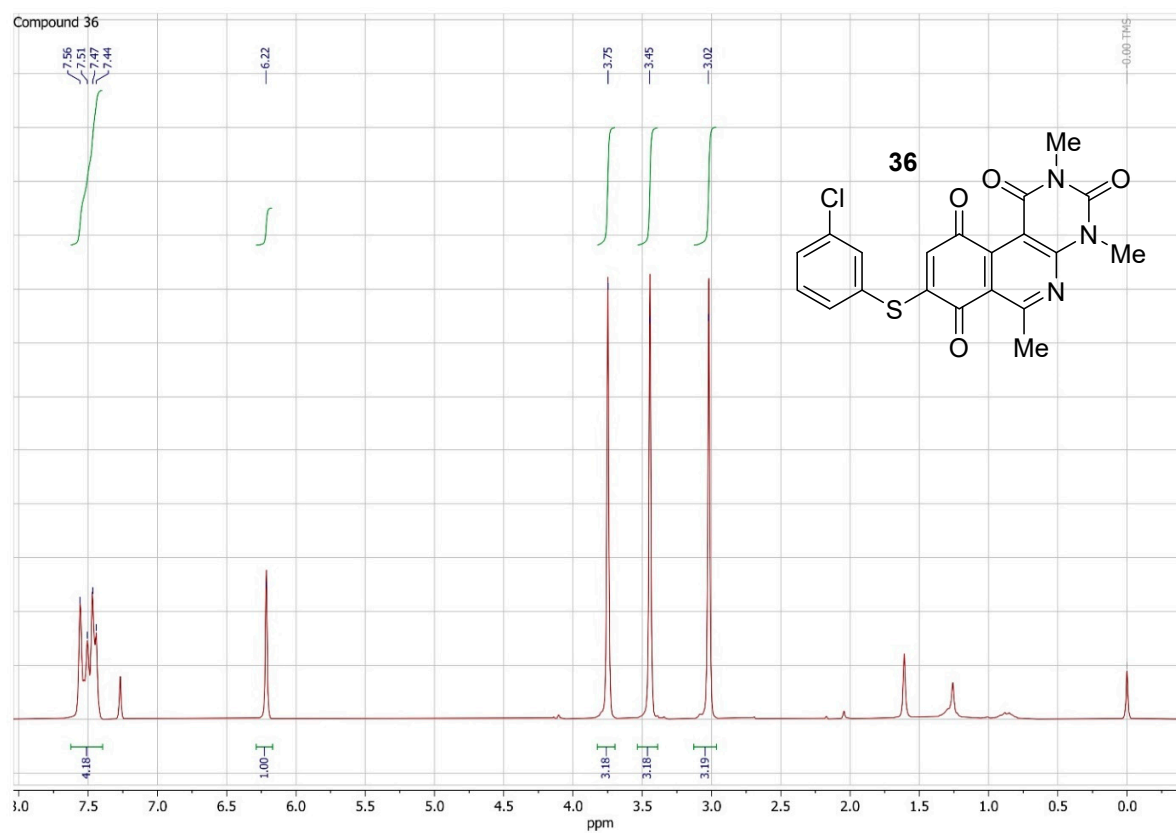

**Figure S7.** <sup>1</sup>H-NMR compound 37.

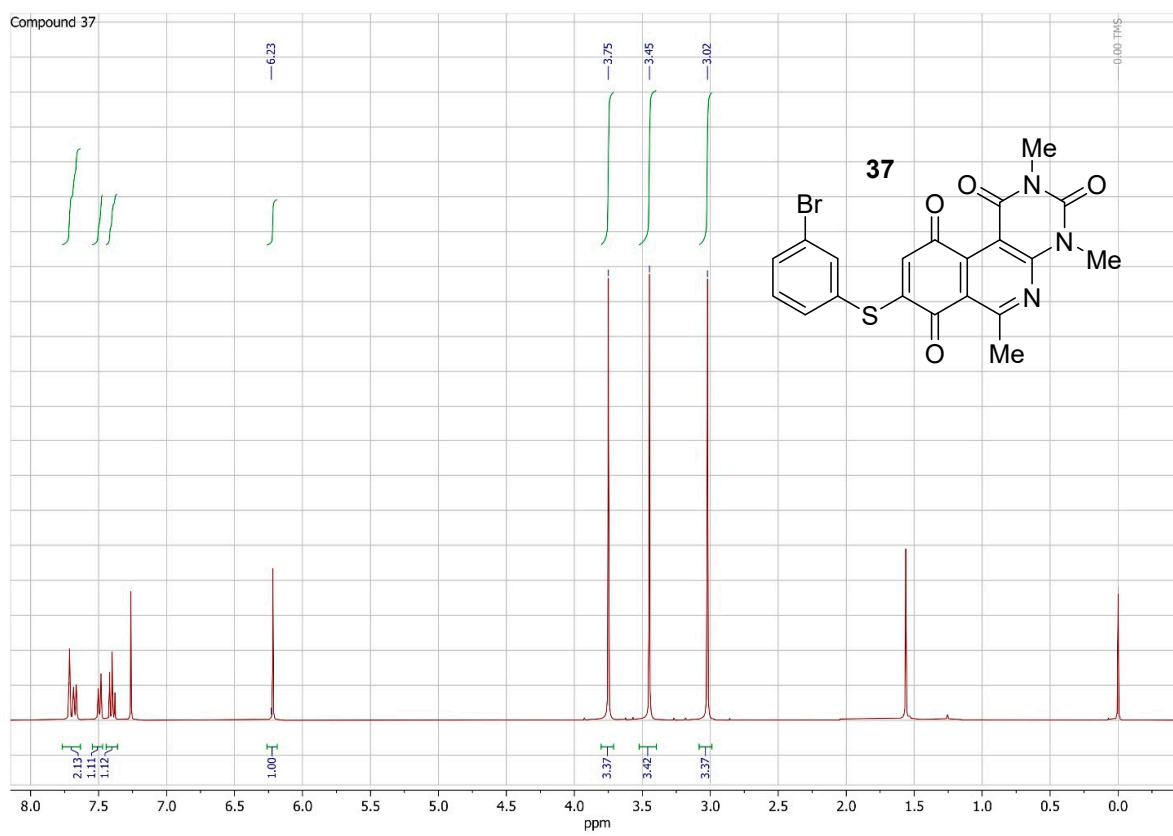

**Figure S8.** <sup>1</sup>H-NMR compound 38.

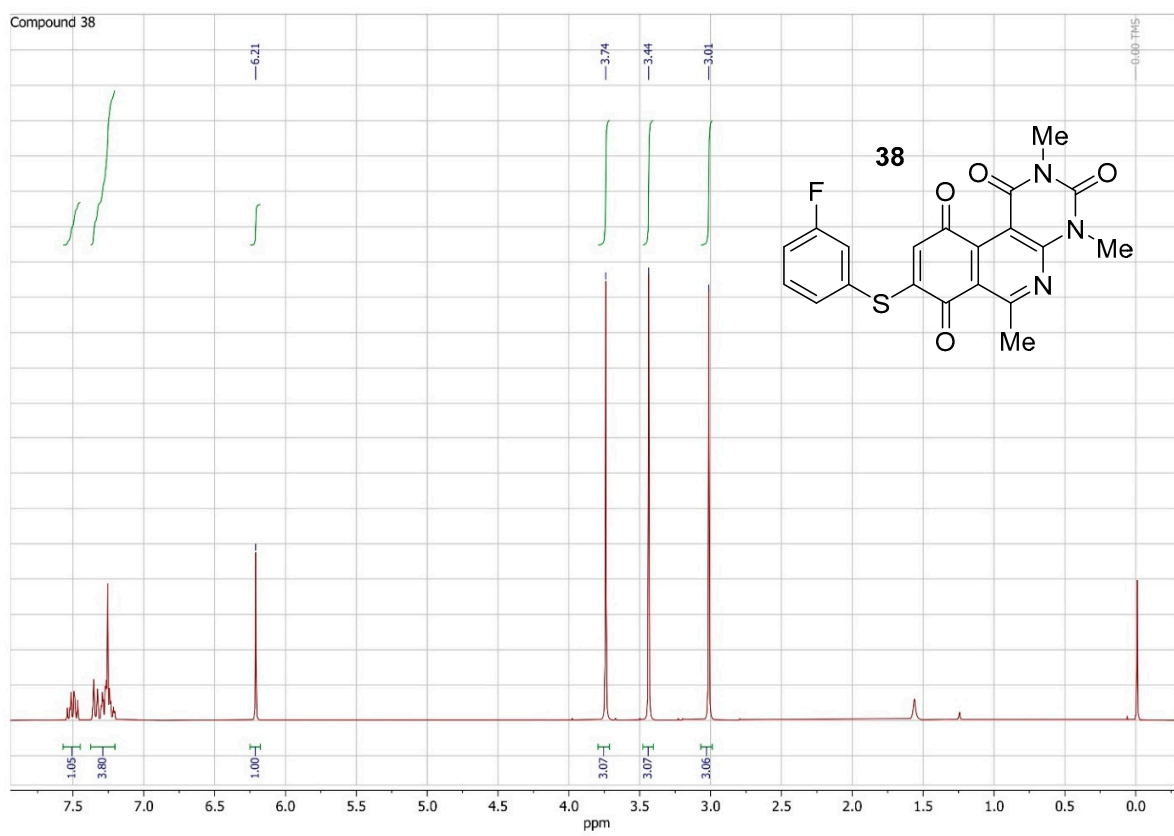

**Figure S9.** <sup>1</sup>H-NMR compound 39.

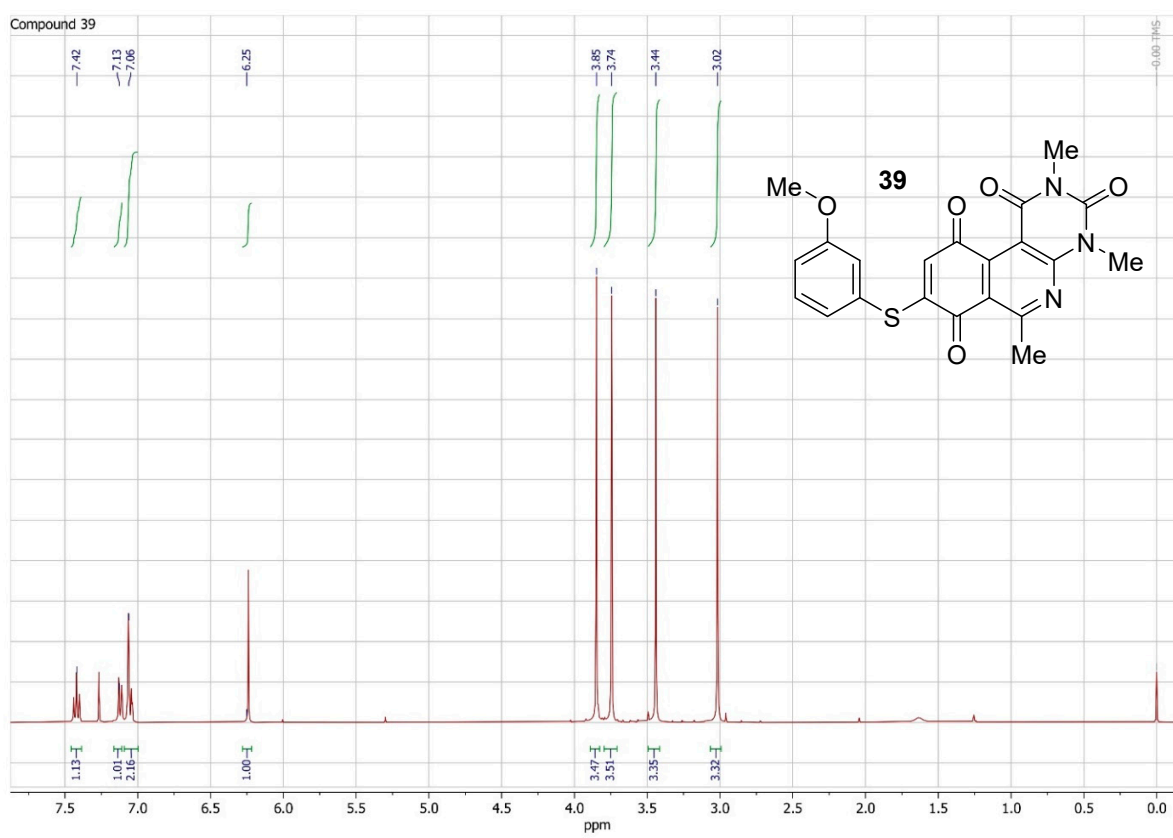

Figure S10. <sup>1</sup>H-NMR compound 40.

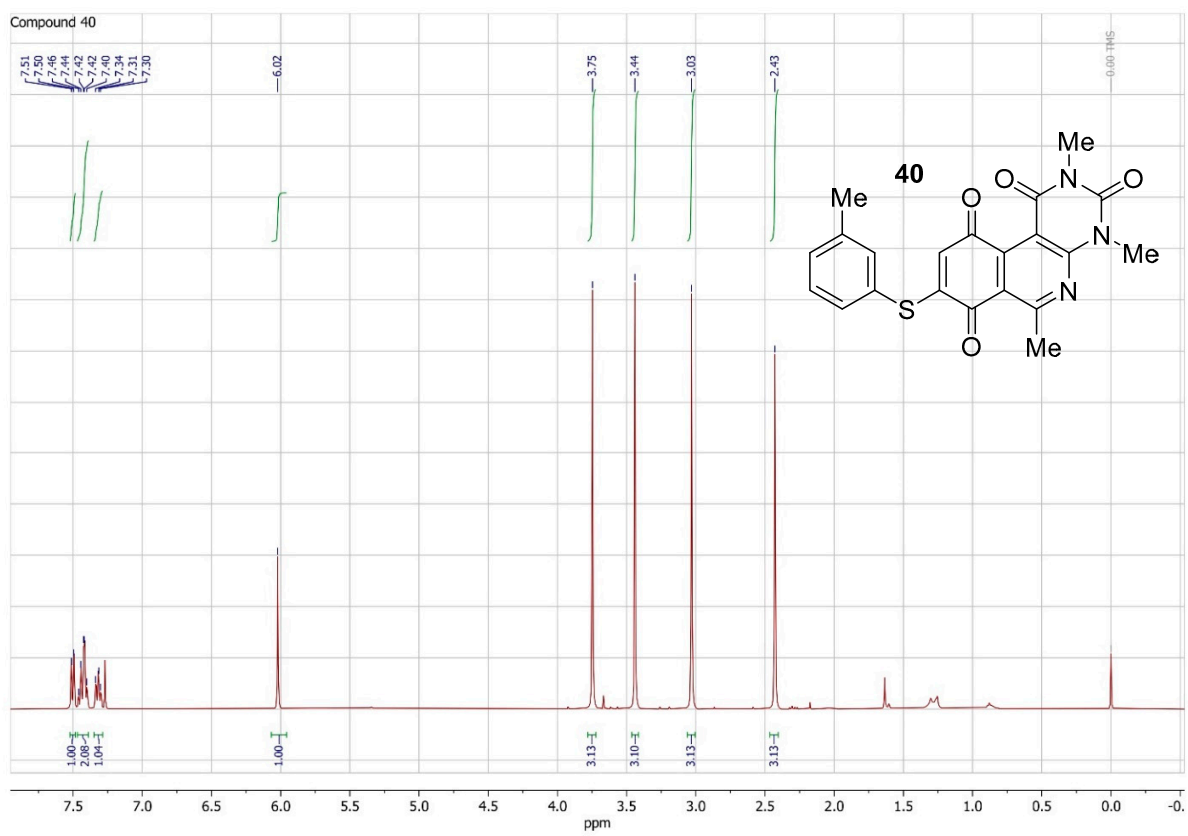

**Figure S11.** <sup>1</sup>H-NMR compound 41.

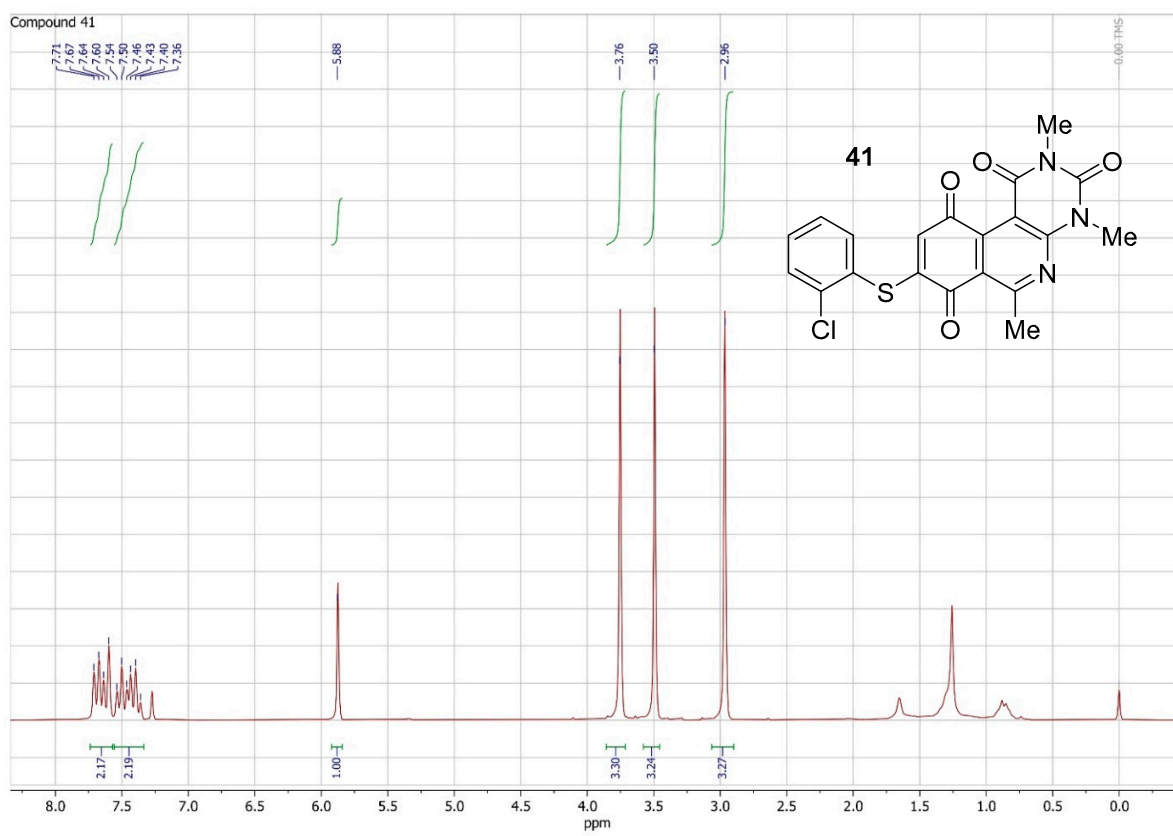

**Figure S12.**  $^1\text{H}$ -NMR compound 42.

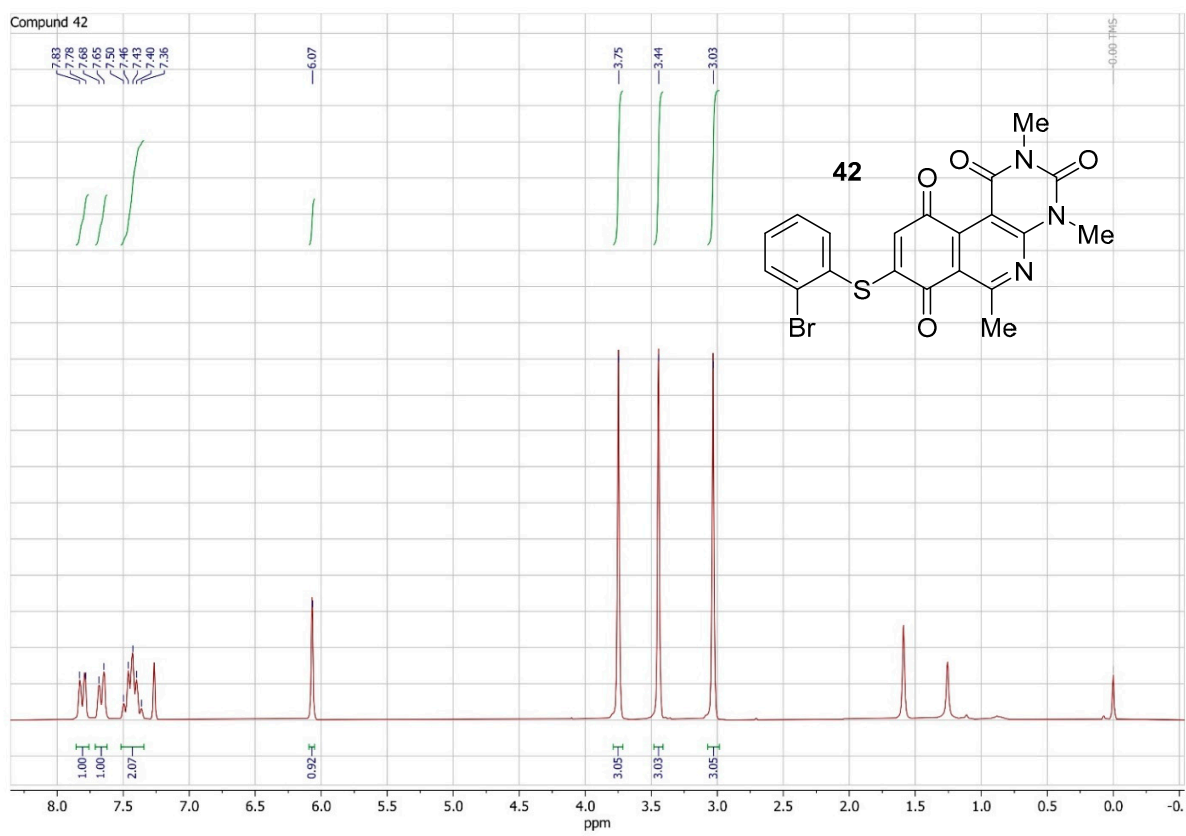

**Figure S13.**  $^1\text{H}$ -NMR compound 43.

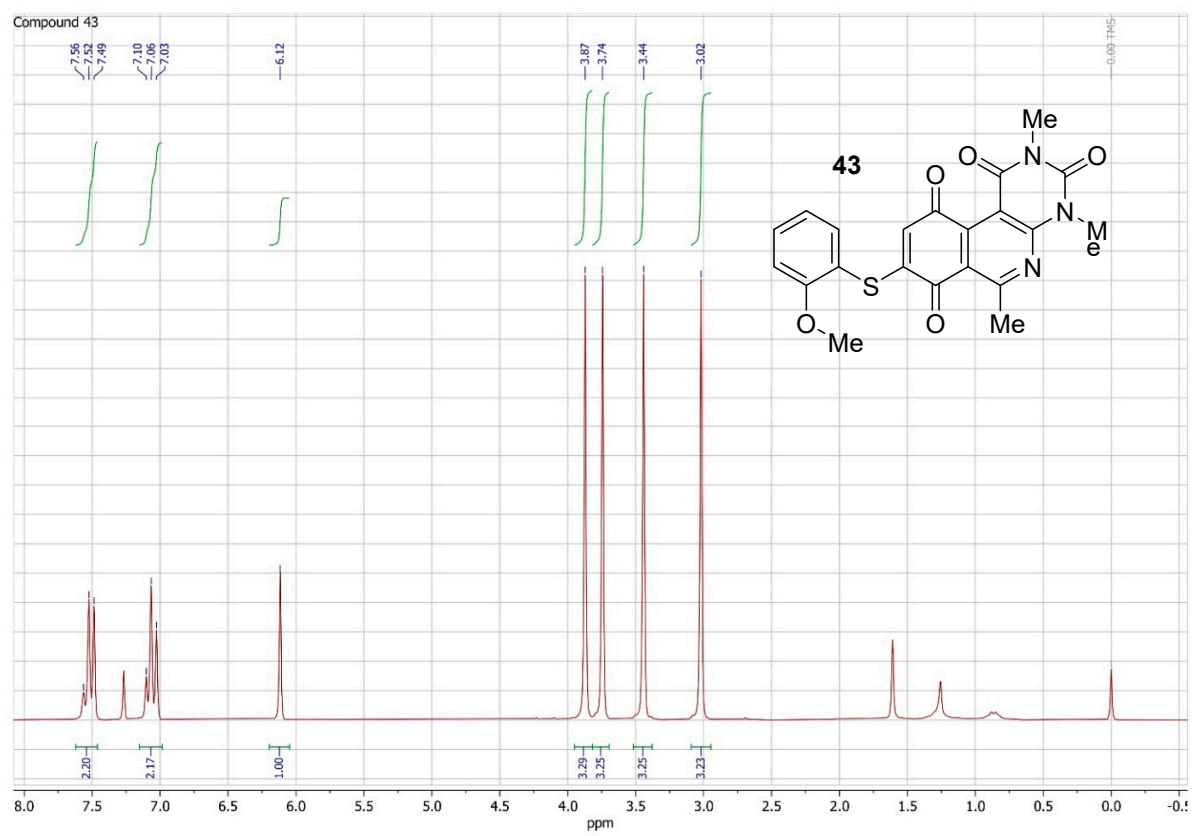

**Figure S14.**  $^1\text{H}$ -NMR compound 44.

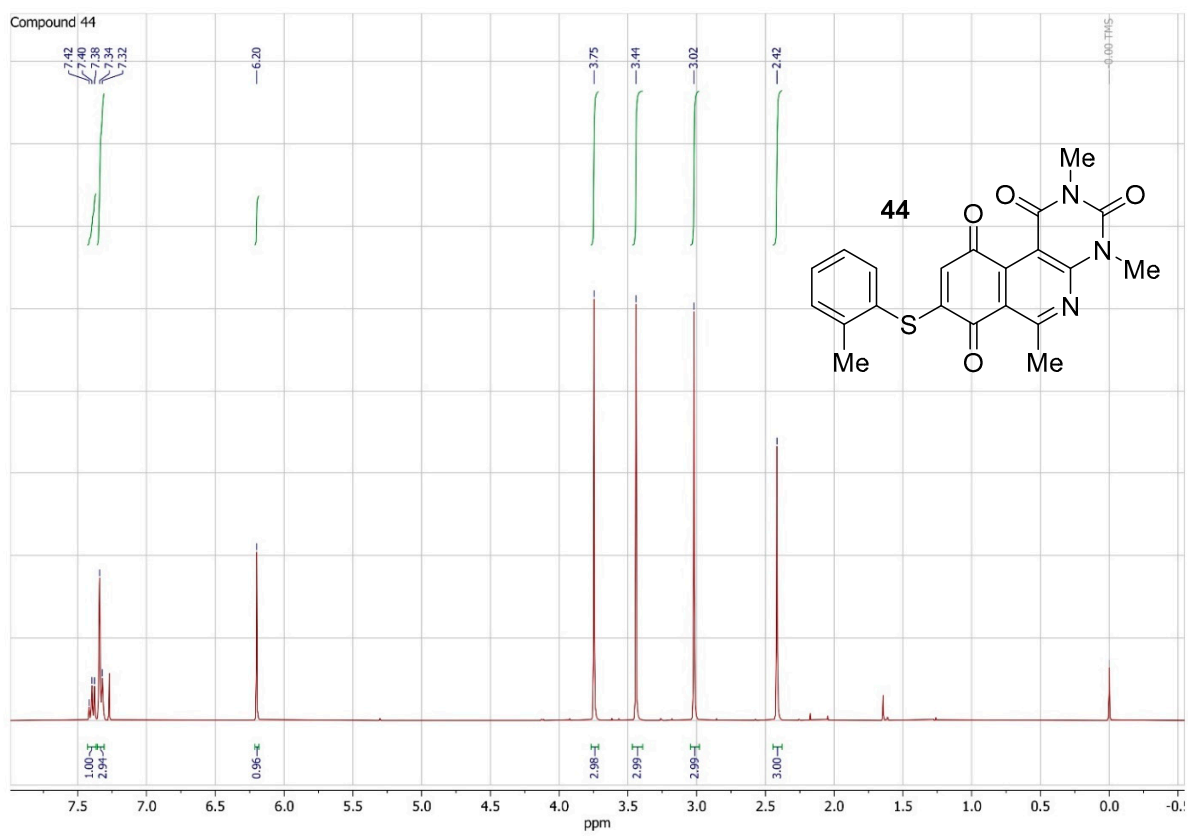

**Figure S15.**  $^1\text{H}$ -NMR compound 45.

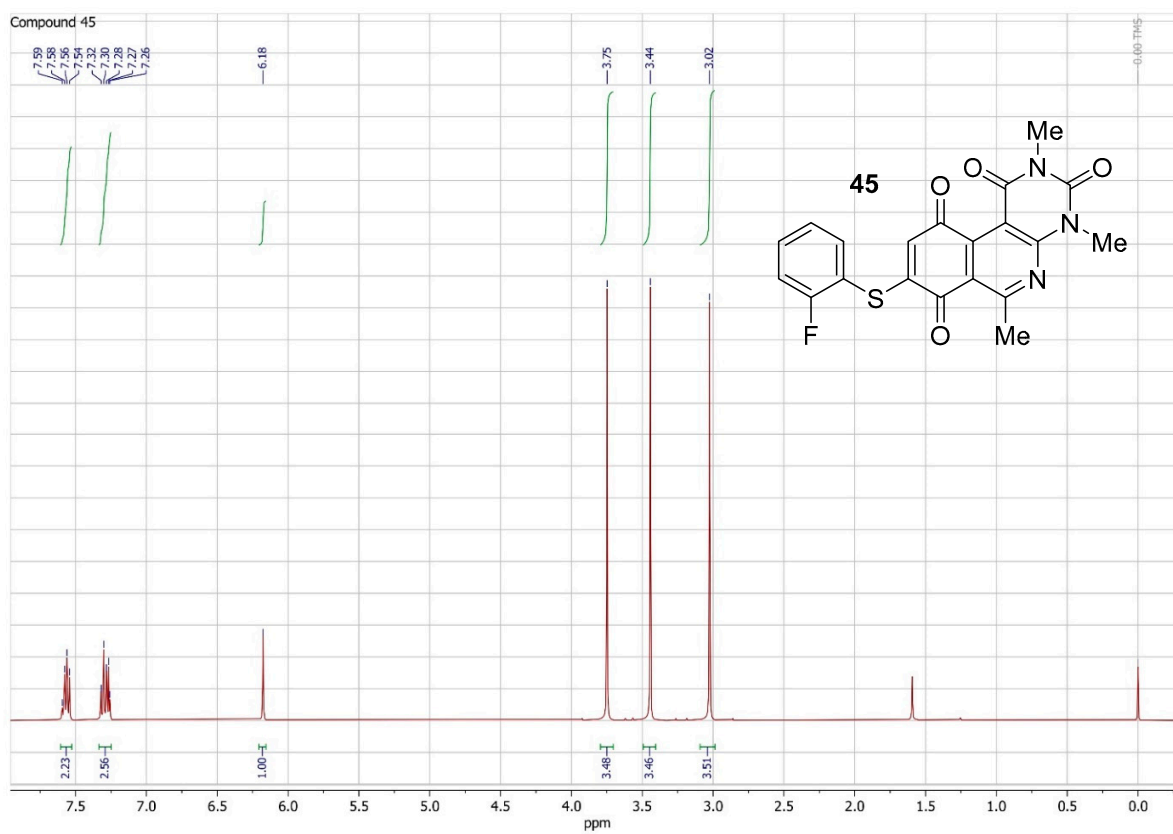

**Table S1.** The sequential search of the best CoMFA and CoMSIA models.

| Model       | q <sup>2</sup> | N  | SEP   | SEE   | r <sup>2</sup> | F       | Field Contributions |       |       |       |       |
|-------------|----------------|----|-------|-------|----------------|---------|---------------------|-------|-------|-------|-------|
|             |                |    |       |       |                |         | S                   | E     | H     | D     | A     |
| CoMFA-S     | 0.66           | 5  | 0.286 | 0.123 | 0.938          | 48.017  | 1                   |       |       |       |       |
| CoMFA-E     | 0.541          | 2  | 0.305 | 0.212 | 0.779          | 33.54   |                     | 1     |       |       |       |
| CoMFA-SE    | 0.619          | 3  | 0.286 | 0.14  | 0.909          | 59.703  | 0.659               | 0.341 |       |       |       |
| CoMSIA-S    | 0.591          | 5  | 0.314 | 0.219 | 0.801          | 12.857  | 1                   |       |       |       |       |
| CoMSIA-E    | 0.482          | 2  | 0.324 | 0.217 | 0.769          | 31.585  |                     | 1     |       |       |       |
| CoMSIA-H    | 0.237          | 1  | 0.383 | 0.31  | 0.502          | 20.169  |                     |       | 1     |       |       |
| CoMSIA-D    | 0.416          | 3  | 0.354 | 0.303 | 0.572          | 8.03    |                     |       |       | 1     |       |
| CoMSIA-A    | 0.275          | 5  | 0.275 | 0.303 | 0.618          | 5.17    |                     |       |       |       | 1     |
| CoMSIA-SE   | 0.468          | 2  | 0.329 | 0.226 | 0.748          | 28.158  | 0.418               | 0.582 |       |       |       |
| CoMSIA-SEH  | 0.526          | 13 | 0.457 | 0.021 | 0.999          | 651.809 | 0.132               | 0.34  | 0.528 |       |       |
| CoMSIA-SEHD | 0.551          | 3  | 0.31  | 0.23  | 0.754          | 18.364  | 0.065               | 0.136 | 0.251 | 0.549 |       |
| CoMSIA-SEHA | 0.534          | 14 | 0.506 | 0.025 | 0.999          | 431.371 | 0.113               | 0.252 | 0.518 |       | 0.117 |
| CoMSIA-SED  | 0.515          | 4  | 0.331 | 0.227 | 0.773          | 14.492  | 0.188               | 0.302 |       | 0.41  |       |
| CoMSIA-SEA  | 0.596          | 5  | 0.312 | 0.159 | 0.895          | 27.276  | 0.269               | 0.504 |       |       | 0.227 |
| CoMSIA-SEDA | 0.52           | 5  | 0.34  | 0.223 | 0.794          | 12.332  | 0.175               | 0.353 |       | 0.275 | 0.197 |
| CoMSIA-SH   | 0.393          | 2  | 0.351 | 0.243 | 0.71           | 23.247  | 0.271               |       | 0.729 |       |       |
| CoMSIA-SD   | 0.56           | 7  | 0.348 | 0.227 | 0.813          | 8.716   | 0.653               |       |       | 0.347 |       |
| CoMSIA-SA   | 0.397          | 5  | 0.381 | 0.218 | 0.802          | 12.956  | 0.55                |       |       |       | 0.45  |
| CoMSIA-SHD  | 0.512          | 3  | 0.323 | 0.254 | 0.698          | 13.84   | 0.077               |       | 0.273 | 0.65  |       |
| CoMSIA-SHA  | 0.467          | 14 | 0.542 | 0.061 | 0.993          | 73.68   | 0.217               |       | 0.556 |       | 0.228 |
| CoMSIA-SDA  | 0.494          | 8  | 0.387 | 0.227 | 0.827          | 0.827   | 0.576               |       |       | 0.258 | 0.166 |
| CoMSIA-SHDA | 0.507          | 15 | 0.562 | 0.066 | 0.993          | 58.439  | 0.203               |       | 0.532 | 0.131 | 0.134 |
| CoMSIA-EH   | 0.505          | 15 | 0.564 | 0.021 | 0.999          | 596.284 |                     | 0.4   | 0.6   |       |       |
| CoMSIA-ED   | 0.499          | 5  | 0.347 | 0.224 | 0.791          | 12.139  |                     | 0.58  |       | 0.42  |       |
| CoMSIA-EA   | 0.574          | 4  | 0.311 | 0.187 | 0.846          | 23.398  |                     | 0.688 |       |       | 0.312 |
| CoMSIA-EHD  | 0.535          | 3  | 0.315 | 0.239 | 0.733          | 16.434  |                     | 0.148 | 0.262 | 0.591 |       |
| CoMSIA-EHA  | 0.526          | 16 | 0.604 | 0.024 | 0.999          | 412.994 |                     | 0.288 | 0.576 |       | 0.136 |
| CoMSIA-EDA  | 0.502          | 5  | 0.346 | 0.23  | 0.781          | 11.386  |                     | 0.465 |       | 0.286 | 0.249 |
| CoMSIA-EHDA | 0.568          | 5  | 0.568 | 0.136 | 0.924          | 38.632  |                     | 0.224 | 0.37  | 0.241 | 0.164 |
| CoMSIA-HD   | 0.477          | 3  | 0.335 | 0.268 | 0.664          | 11.862  |                     |       | 0.273 | 0.727 |       |
| CoMSIA-HA   | 0.443          | 14 | 0.443 | 0.075 | 0.99           | 48.305  |                     |       | 0.764 |       | 0.236 |
| CoMSIA-HDA  | 0.454          | 2  | 0.333 | 0.279 | 0.615          | 15.186  |                     |       | 0.117 | 0.749 | 0.133 |
| CoMSIA-DA   | 0.439          | 3  | 0.347 | 0.298 | 0.586          | 8.502   |                     |       |       | 0.842 | 0.158 |
| CoMSIA-ALL  | 0.571          | 5  | 0.321 | 0.137 | 0.922          | 37.606  | 0.088               | 0.192 | 0.341 | 0.239 | 0.139 |
